# Supplementary material for: An acid-chromic luminescent lanthanide metallogel for time-dependent information encryption and anti-counterfeiting
Source: Royal Society of Chemistry journal article supplement (doi:10.1039/d4dt00700j), 2024-01-01
Supplement: d4dt00700j1.pdf [file d4dt00700j1.pdf]

Supporting Information for

**An acid-chromic luminescent lanthanide metallogel for time-dependent information encryption and anti-counterfeiting**

Binbin Zhang,<sup>\*a b</sup> Yu Gan,<sup>a</sup> Chao Liu,<sup>a</sup> Qiuyu He,<sup>a</sup> Jingye Chen,<sup>a</sup> Jiaqi Li,<sup>a</sup> Yanxiang You,<sup>a</sup>

Wenxiu Fan,<sup>a</sup> Yujie Wang,<sup>a</sup> and Guangyue Bai<sup>\*b</sup>

\*Corresponding authors

<sup>a</sup> Postdoctoral Innovation Practice Base, School of Chemistry and Chemical Engineering, Henan

Institute of Science and Technology, Xinxiang, Henan 453003, P. R. China

E-mail: [zbb@hist.edu.cn](mailto:zbb@hist.edu.cn);

<sup>b</sup> Collaborative Innovation Center of Henan Province for Green Manufacturing of Fine Chemicals,

Key Laboratory of Green Chemical Media and Reactions, Ministry of Education, Post-doctoral

Research Center, School of Chemistry and Chemical Engineering, Henan Normal University,

Xinxiang, Henan 453007, P. R. China

E-mail: [baiguangyue@htu.cn](mailto:baiguangyue@htu.cn)

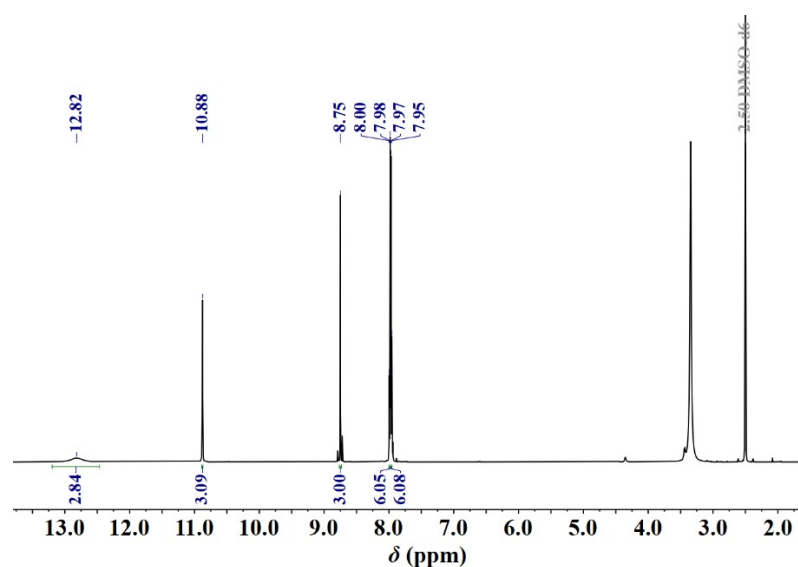

Fig. S1. The <sup>1</sup>H NMR spectrum of H<sub>3</sub>L.

**Table S1.** Gelation tests of  $H_3L/Tb^{3+}$  in different mixed solvents

| Results            | v/v |     |     |     |     |     |     |     |     |     |
|--------------------|-----|-----|-----|-----|-----|-----|-----|-----|-----|-----|
|                    |     | 9/1 | 8/2 | 7/3 | 6/4 | 5/5 | 4/6 | 3/7 | 2/8 | 1/9 |
| Solvents           |     |     |     |     |     |     |     |     |     |     |
| DMF/ $CH_3OH$      |     | TS  |
| DMF/ $H_2O$        |     | TS  | TS  | G   | G   | G   | G   | G   | G   | TS  |
| DMSO/ $H_2O$       |     | TS  | TS  | TS  | TS  | G   | G   | G   | G   | G   |
| DMF/ $CH_3CH_2OH$  |     | TS  |
| DMSO/ $CH_3OH$     |     | TS  |
| DMSO/ $CH_3CH_2OH$ |     | TS  |

G = gel; TS = turbid solution.  $C_{H_3L} = 0.02$  mol/L;  $C_{Tb^{3+}} = 0.02$  mol/L;  $C_{NaOH} = 0.04$  mol/L.

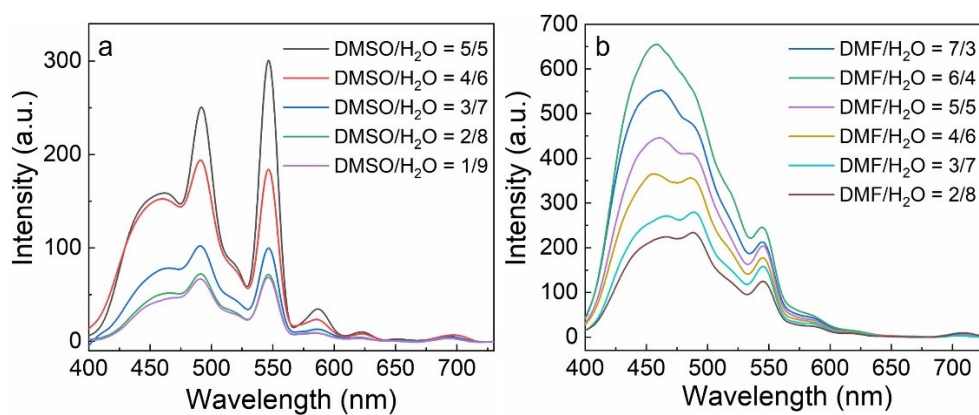

**Fig. S2.** The influence of the mixed solvents of (a) DMSO/ $H_2O$  and (b) DMF/ $H_2O$  on the luminescence of  $H_3L/Tb^{3+}$  ( $\lambda_{ex} = 344$  nm).

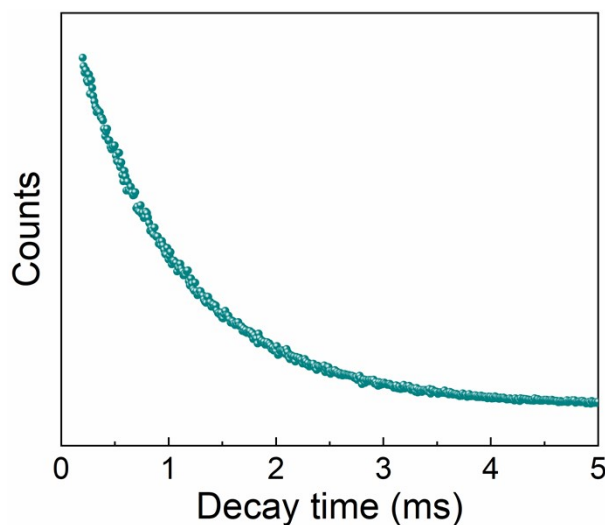

**Fig. S3.** The luminescence decay curve of the  $H_3L/Tb^{3+}$  gel ( $\lambda_{ex} = 344$  nm and  $\lambda_{mon} = 546$  nm)

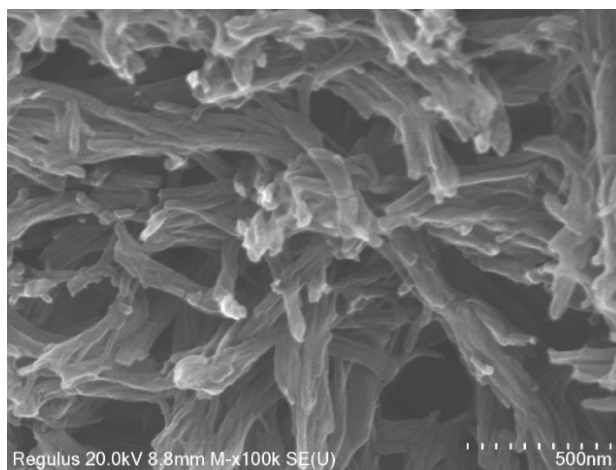

**Fig. S4.** SEM image of the dried product of H<sub>3</sub>L.

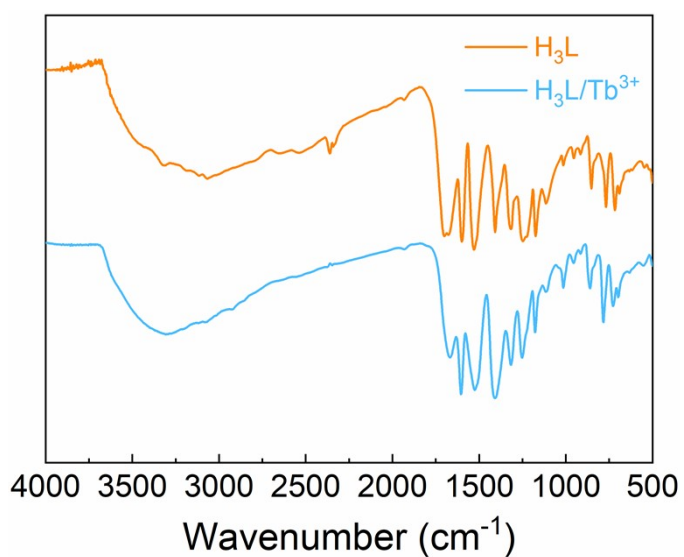

**Fig. S5.** FT-IR spectra of the H<sub>3</sub>L and the H<sub>3</sub>L/Tb<sup>3+</sup> xerogel.

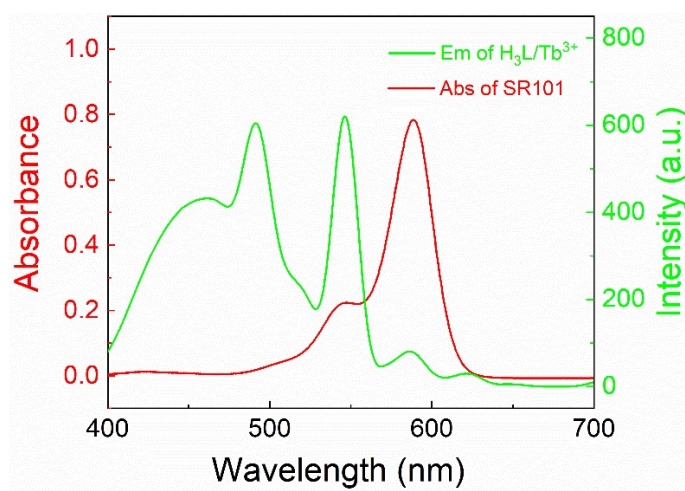

**Fig. S6.** The adsorption spectra of SR101 and the emission spectra of H<sub>3</sub>L/Tb<sup>3+</sup>.

**Table S2.** Analyzed lifetime data for Tb<sup>3+</sup> in H<sub>3</sub>L/Tb<sup>3+</sup> gel and SR101 containing H<sub>3</sub>L/Tb<sup>3+</sup> gel with variable SR101 concentration.

| SR101 (μM) | Lifetime (μs)                                                                     | Average lifetime (μs) | Energy transfer efficiency (%) |
|------------|-----------------------------------------------------------------------------------|-----------------------|--------------------------------|
| 0          | $\tau_1=731.99; B_1=1654.21$<br>$\tau_2=1142.92; B_2=3143.99$<br>$\chi^2 = 1.042$ | 1039.35               | 0                              |
| 2.5        | $\tau_1=594.49; B_1=1233.18$<br>$\tau_2=1110.34; B_2=3513.61$<br>$\chi^2 = 1.132$ | 1028.74               | 1.02                           |
| 5          | $\tau_1=539.07; B_1=1306.95$<br>$\tau_2=1079.34; B_2=3307.34$<br>$\chi^2 = 1.052$ | 990.29                | 4.72                           |
| 10         | $\tau_1=424.50; B_1=1274.34$<br>$\tau_2=1016.59; B_2=3337.56$<br>$\chi^2 = 1.152$ | 935.17                | 10.02                          |
| 15         | $\tau_1=383.40; B_1=1407.10$<br>$\tau_2=991.30; B_2=3195.78$<br>$\chi^2 = 1.125$  | 902.85                | 13.13                          |
| 25         | $\tau_1=355.32; B_1=1472.89$<br>$\tau_2=966.68; B_2=3016.09$<br>$\chi^2 = 1.091$  | 873.64                | 15.94                          |
| 35         | $\tau_1=310.26; B_1=1709.80$<br>$\tau_2=890.17; B_2=2735.85$<br>$\chi^2 = 1.171$  | 786.44                | 24.33                          |
| 70         | $\tau_1=217.37; B_1=2044.86$                                                      | 620.63                | 40.29                          |

|  |                                              |  |  |
|--|----------------------------------------------|--|--|
|  | $\tau_2=741.43; B_2=2001.27$<br>$^2 = 1.119$ |  |  |
|--|----------------------------------------------|--|--|

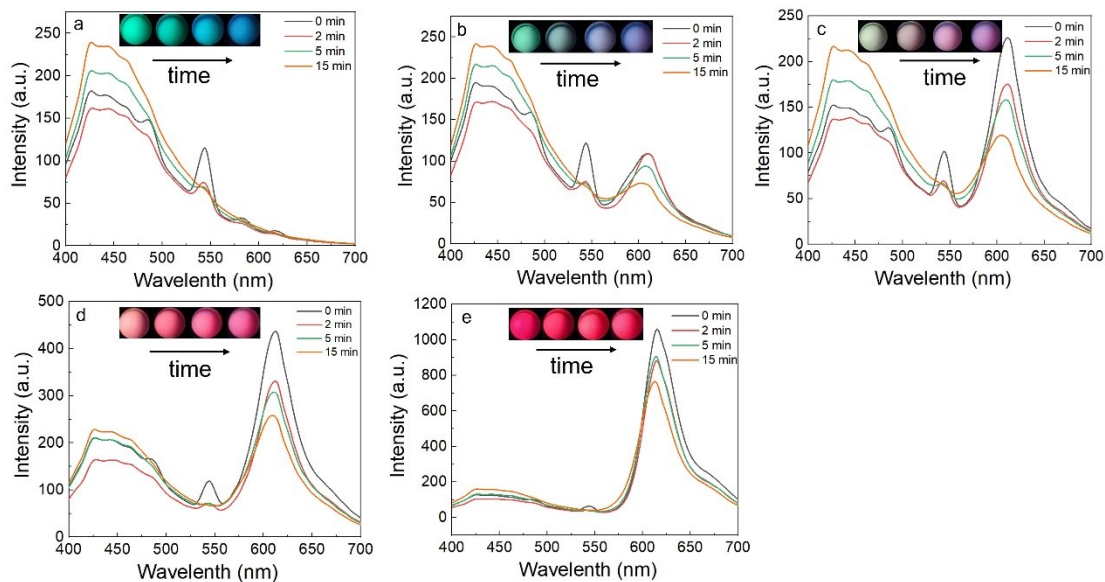

**Fig. S7.** Changes of emission spectra and photographs of SR101-doped  $H_3L/Tb^{3+}$  gels after spray of glucono- $\delta$ -lactone (0.2 mol/L). (a) SR101 = 0  $\mu M$ , (b) SR101 = 5  $\mu M$ , (c) SR101 = 10  $\mu M$ , (d) SR101 = 25  $\mu M$ , (e) SR101 = 70  $\mu M$ .
